# Supplementary material for: Asymmetric nucleosomes flank promoters in the budding yeast genome
Source: PubMed Central journal article supplement — Genome Res. 2015 Mar;25(3):381–90. doi: 10.1101/gr.182618.114 (PMC4352886; doi:10.1101/gr.182618.114), 2015-03
Supplement: supp_gr.182618.114_Supplemental_Material.pdf [file supp_gr.182618.114_Supplemental_Material.pdf]

**SUPPLEMENTARY INFORMATION**

**Asymmetric nucleosomes flank promoters in the budding yeast genome**

Srinivas Ramachandran, Gabriel E. Zentner and Steven Henikoff

## SUPPLEMENTAL FIGURE LEGENDS

**Figure S1. Features of asymmetric nucleosomes.** (A) A 10-kb snapshot of H4S47C-anchored cleavage mapping data. (B) The normalized frequency of left and right ends of the cleavage fragments averaged over nucleosome positions genome-wide is plotted. The left ends contribute to the -1 and +6 peaks around the dyad axis (left) and the right ends to contribute to the -6 and +1 peaks around the dyad axis (right).

**Figure S2. Z-score difference distributions of asymmetric positions and all nucleosome positions.** Distribution of the difference between the 5 ntd Z-score and the -2 ntd Z-score (top) highlights the cut-off of the 2.5 Z-score difference used to identify asymmetric nucleosomes, whereas the Z-score difference of most nucleosome positions is around zero. The distribution of difference between 5 ntd Z-score and 12 ntd Z-score (bottom) for asymmetric nucleosomes is significantly right-shifted from zero, indicating that for asymmetric nucleosomes, the 5 ntd Z-score is disproportionately higher than the 12 ntd Z-score, as expected for predominant cleavages by one H4 in the nucleosome rather than two H4s.

**Figure S3. Distinction between centromeric nucleosomes and nucleosomes in the rest of the genome.** (A) The normalized H4S47C-anchored cleavage frequency was averaged over the dyad axis for all nucleosomes and asymmetric nucleosomes and over the H4 position for centromeric nucleosomes. (B) The degree of asymmetry of all nucleosomes was compared to that of asymmetric nucleosomes and centromeric nucleosomes. The number inside the bar indicates the number of nucleosome positions that comprise each group. Error bars denote standard error of mean and the p-values were calculated using the Wilcoxon test.

**Figure S4. Robustness of H4-S47C-anchored cleavage mapping.** (A) The normalized cleavage frequency from three independent replicates are averaged over all yeast nucleosome positions and

plotted relative to the nucleosome dyad. (B) The normalized cleavage frequencies from three independent replicates are averaged over asymmetric nucleosome positions and is plotted relative to the nucleosome dyad axis. The nucleosomes are oriented so that the side of the dyad axis with more cleavages is on the right.

**Figure S5. H4S47C-anchored cleavage data from Brogaard et al.** (A) Heatmap of cleavage mapping data of 1500 symmetric nucleosomes (top), 1654 asymmetric nucleosomes with more cleavages on the left (middle) and 1585 asymmetric nucleosomes with more cleavages on the right side of the dyad (bottom), reproduced from Figure 1E. (B) Heatmap of cleavage mapping data of 1500 symmetric nucleosomes (top), 1654 asymmetric nucleosomes with more cleavages on the left (middle) and 1585 asymmetric nucleosomes with more cleavages on the right side of the dyad (bottom), plotted using data from the Short Read Archive (SRR438673-76) (Brogaard et al. 2012a).

**Figure S6. H4-WT cleavage mapping.** To confirm that the asymmetric cleavages we observed depended on the H4S47C mutation, we analyzed the cleavage frequency from an experiment where wild-type cells were labeled with 1, 10-orthophenanthroline and cleavage reactions were carried out in a manner identical to H4S47C-anchored cleavage mapping. In the experiment with the strain containing wild-type (WT) H4, we observe no specific cleavage positions at either asymmetric nucleosome positions or at all nucleosome positions.

**Figure S7. Reproducible positional enrichment of asymmetric nucleosomes.** Asymmetric nucleosome positions were independently identified in three replicate datasets and their enrichment at genic nucleosome positions and non-genic positions was calculated. p-values calculated using a hypergeometric test are shown for significantly enriched positions (+1 and -1).

**Figure S8. H4S47C-anchored cleavage frequency at asymmetric  $\pm 1$  nucleosome positions.** (A) Heatmaps of cleavage mapping data at asymmetric +1 nucleosome positions plotted in the direction of

transcription. At a scale of dyad  $\pm 400$  bp, the NDR and the downstream nucleosome array can be seen (left). At a scale of dyad  $\pm 15$  bp, the asymmetric cleavages around the dyad are resolved (right). The nucleosome positions with higher cleavages downstream of the dyad (top) are separated from nucleosome positions with higher cleavages upstream of the dyad (bottom). (B) Same as (A) for asymmetric -1 nucleosome positions.

**Figure S9. Turnover rate at asymmetric  $\pm 1$  nucleosome positions.** Box plots comparing the distribution of turnover Z-scores of all  $\pm 1$  nucleosome positions and asymmetric  $\pm 1$  nucleosome positions. The central line in the box-plot denotes the median, the upper and lower edges of the box denote the interquartile range and the whiskers extend to 1.5 times the interquartile range. Outliers are omitted for clarity.

**Figure S10. MNase-seq as a probe of the accessibility of nucleosomal DNA.** The distribution of MNase cuts, plotted relative to the nucleosome dyad axis for all +1 nucleosomes ( $n=4116$ ) reveals peaks with a 10 bp periodicity, reflecting the accessibility of DNA wrapped around the histone octamer. The accessibility steadily decreases from the outer edge towards inside except at specific cuts  $\pm 5$  bp of the dyad.

**Figure S11. RSC binding does not depend on the direction of asymmetry.** ChIP-seq of the RSC catalytic subunit, Sth1 is plotted for asymmetric nucleosomes that have higher cleavages on the downstream side of the dyad with respect to the TSS ( $n=171$ ) and for asymmetric nucleosomes that have higher cleavages on the upstream side of the dyad with respect to the TSS ( $n=236$ ). All nucleosomes are oriented towards the direction of transcription. The fragment centers were obtained from paired-end sequencing data and correspond to fragments of length  $200 \pm 20$  bp. Data are averaged over a 20 bp moving window.

**Figure S12. Nucleosome landscape after RSC depletion.** Nucleosome landscape relative to the TSS is plotted for all genes with mapped  $\pm 1$  nucleosome positions and genes with mapped asymmetric  $\pm 1$  nucleosome positions. The data were obtained from a study in which Sth1 levels were depleted  $\sim 2$  fold (Van de Vosse et al. 2013).

Figure S1

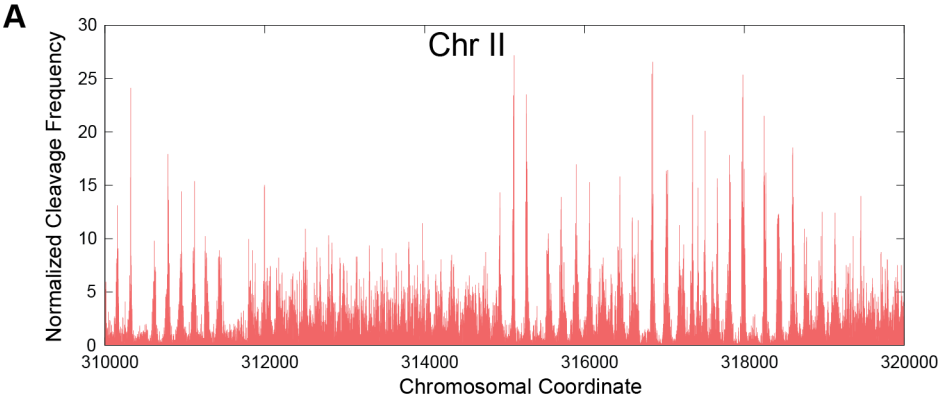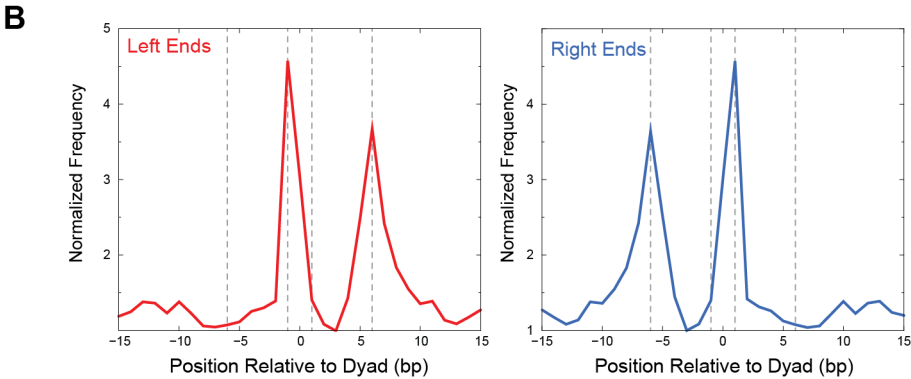

Figure S2

-2 NTD (Identifies Asymmetric Nucleosome Positions)

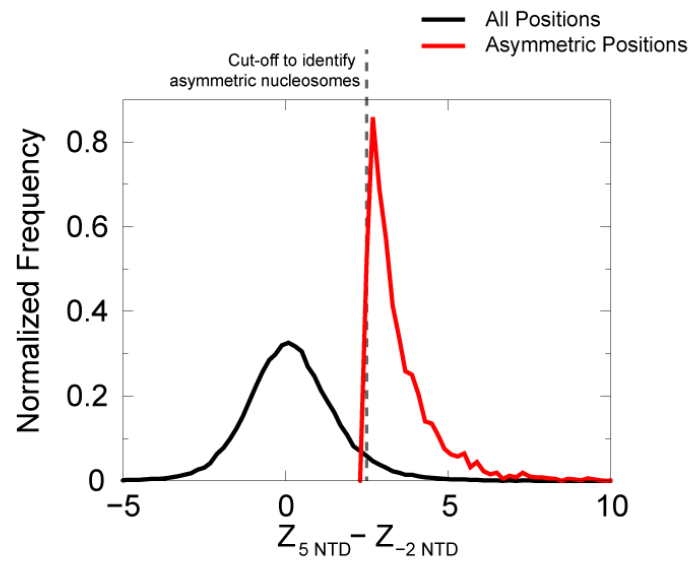

12 NTD (Distinguishes Asymmetric Nucleosome Positions)

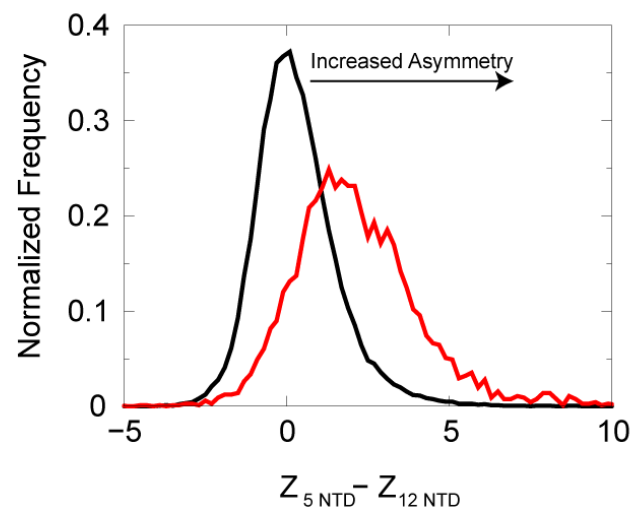

Figure S3

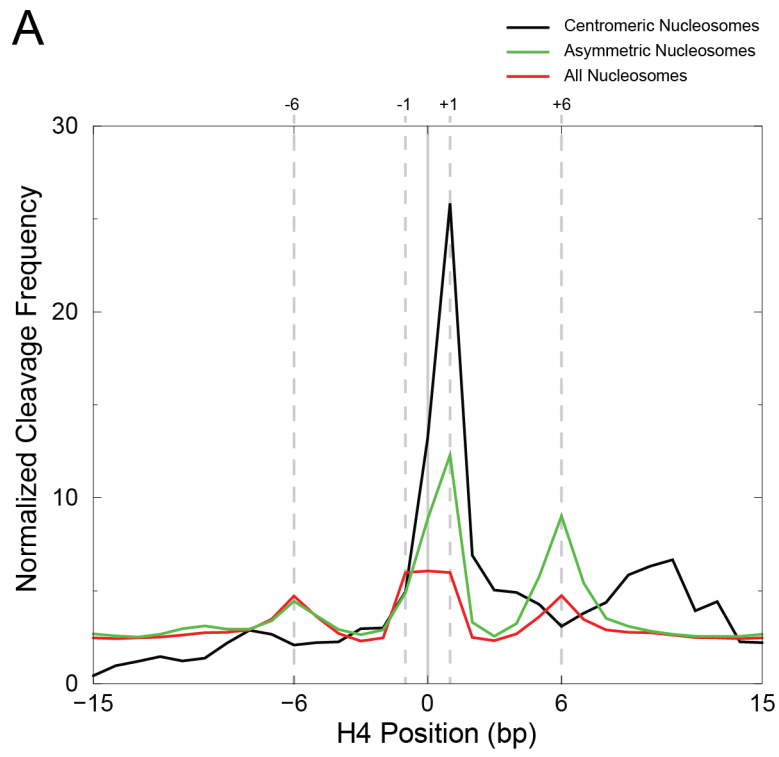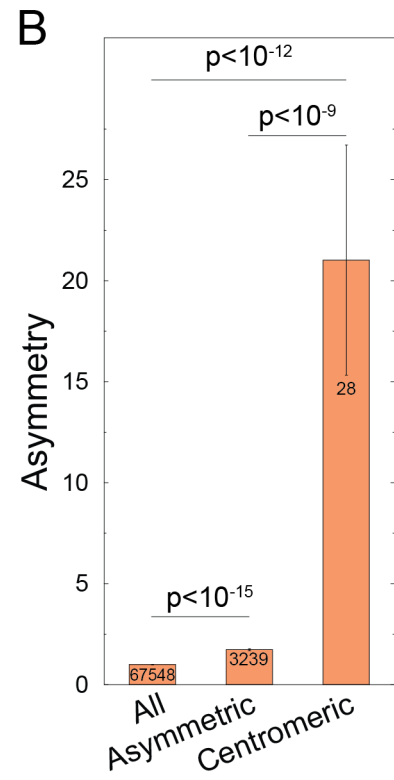



Figure S4

**A**

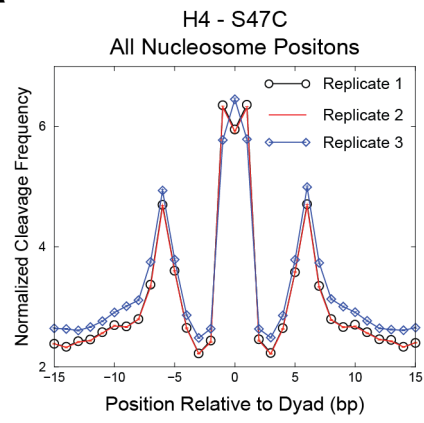

**B**

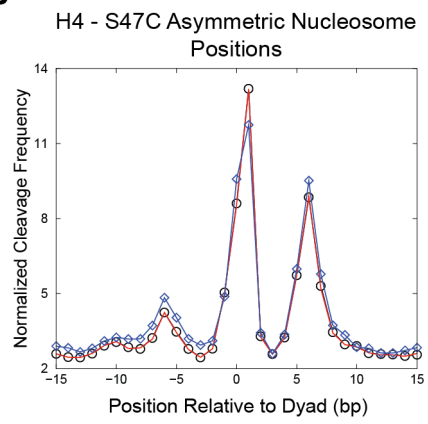

Figure S5

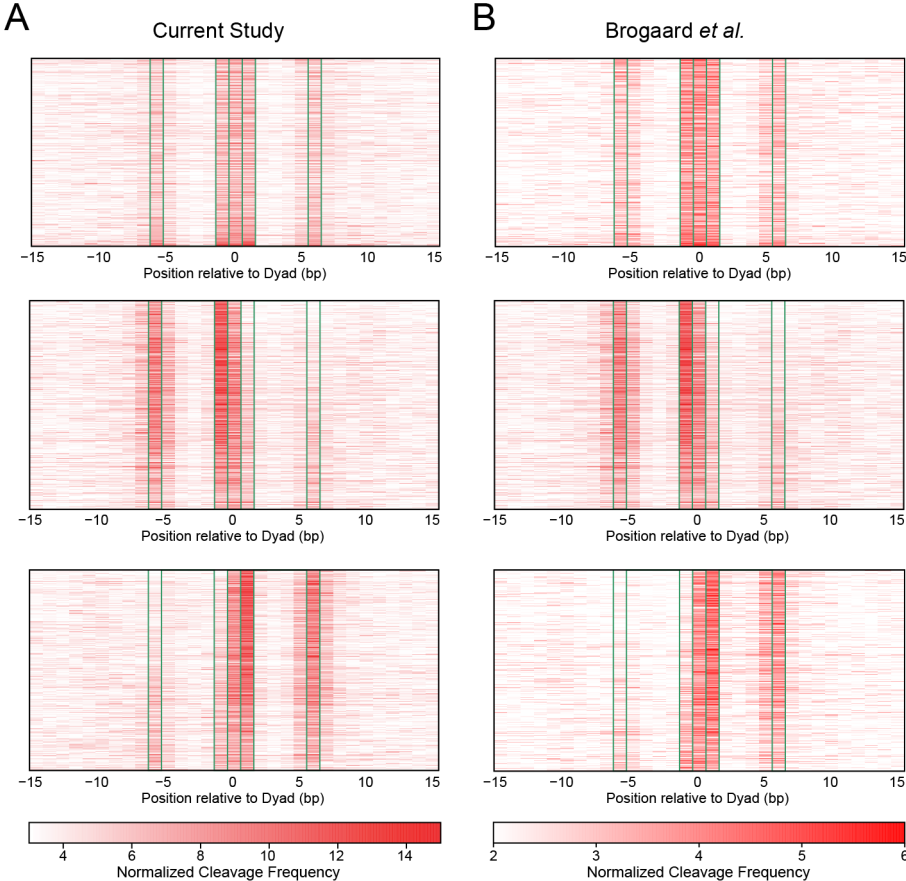

Figure S6

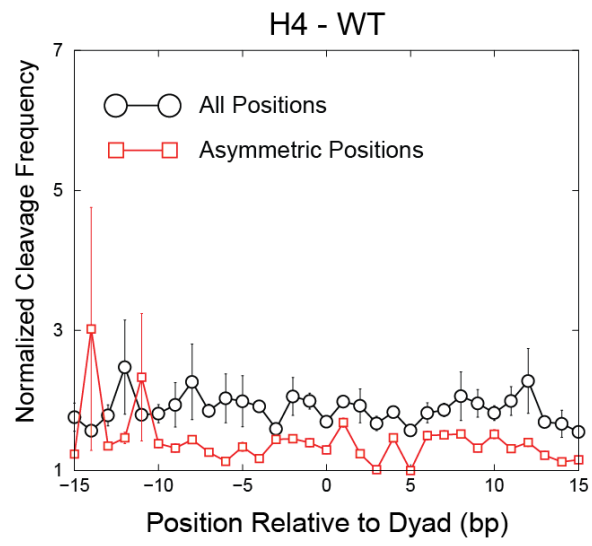

Figure S7

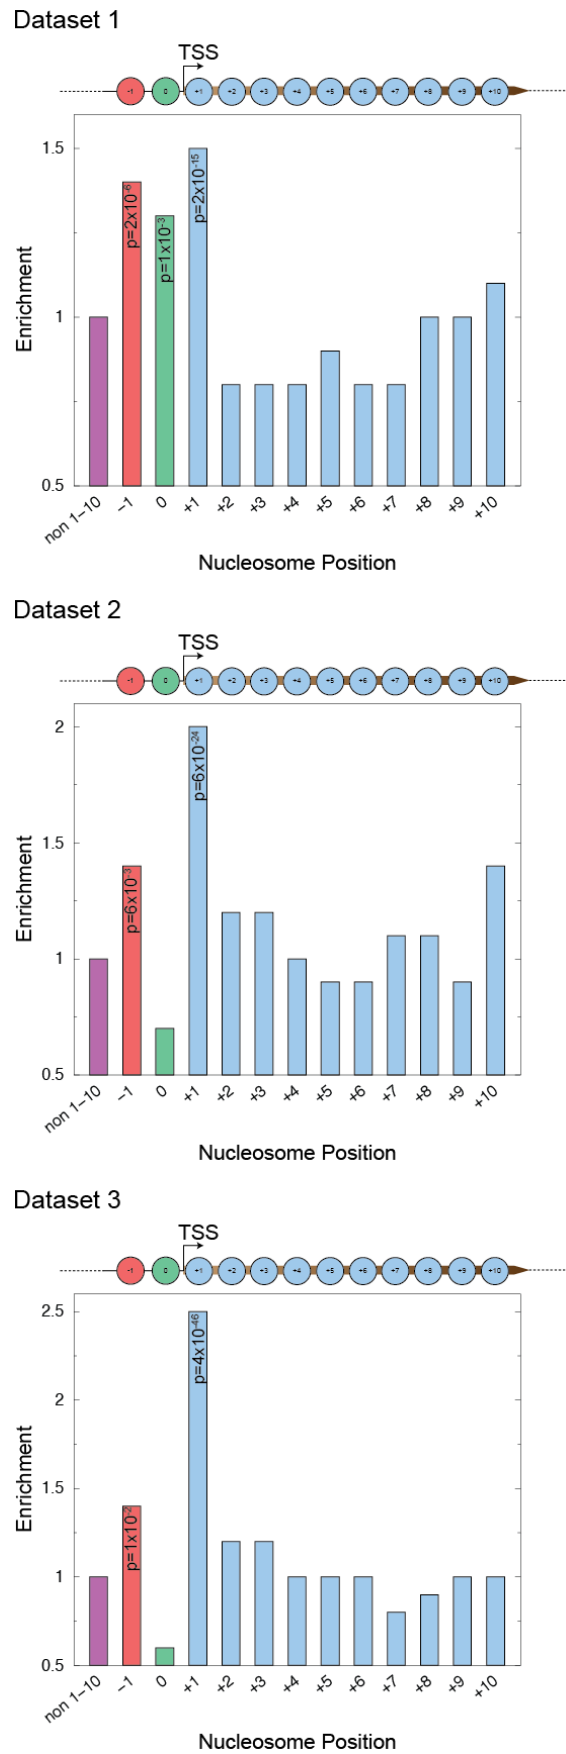

**Figure S8**

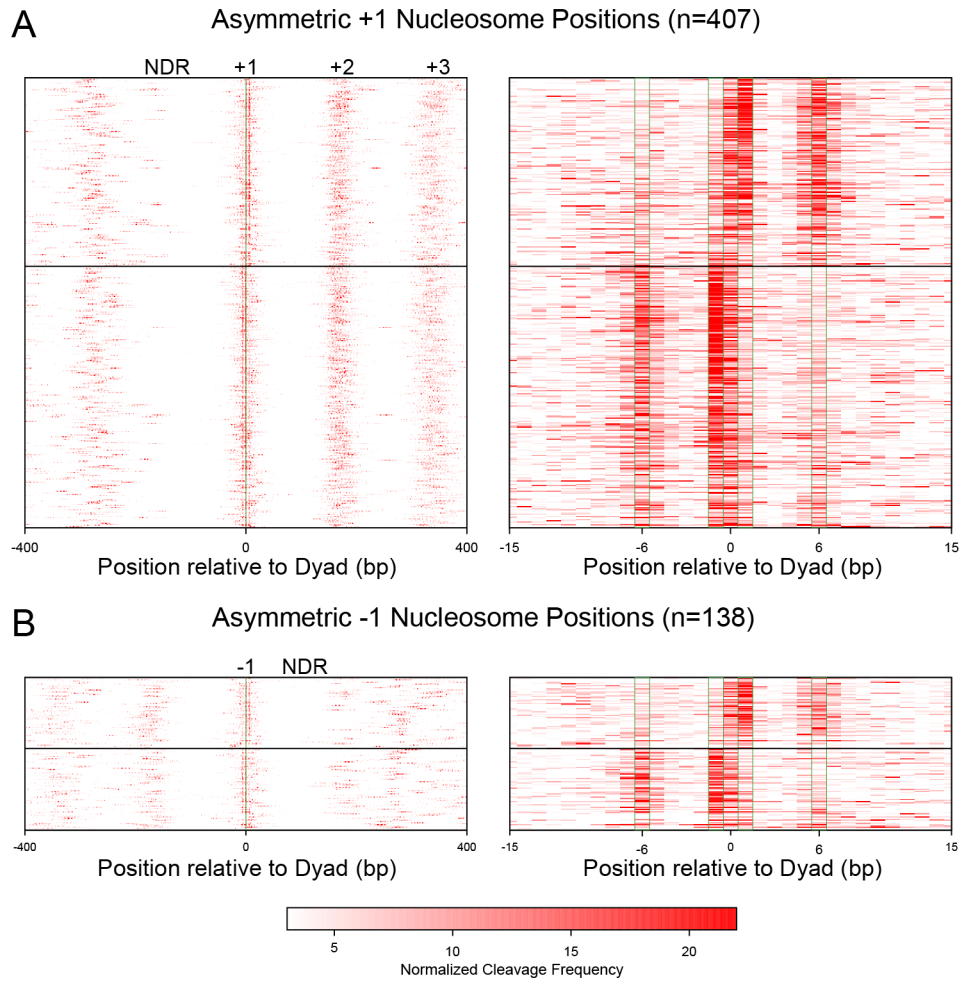

Figure S9

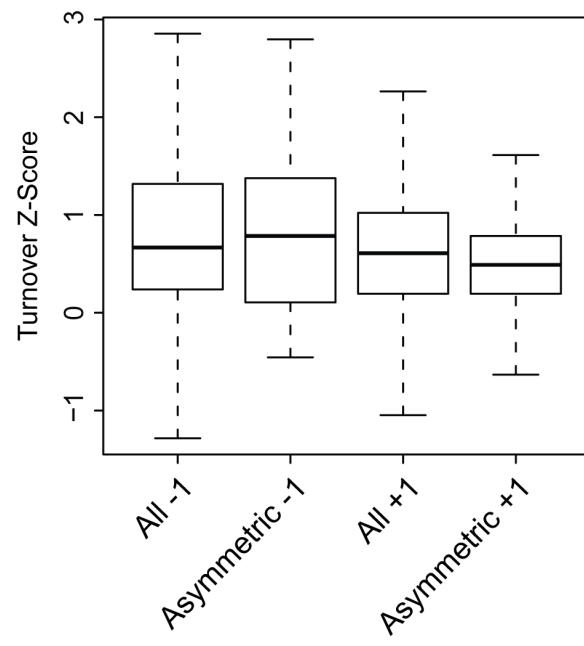

Figure S10

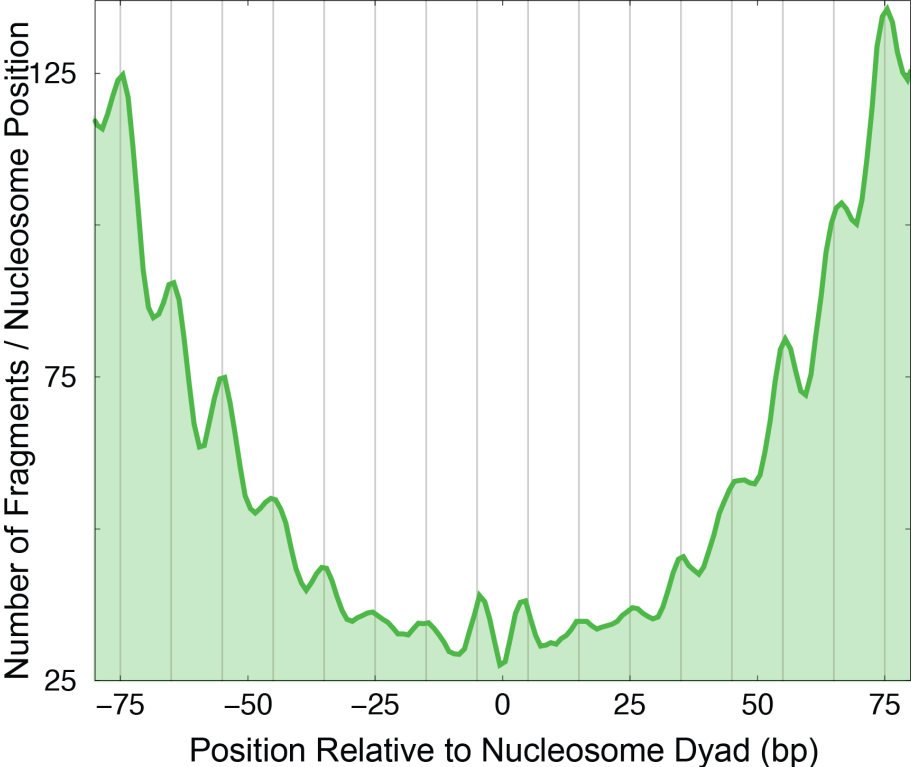

Figure S11

RSC ChIP-seq at Asymmetric +1 Nucleosome

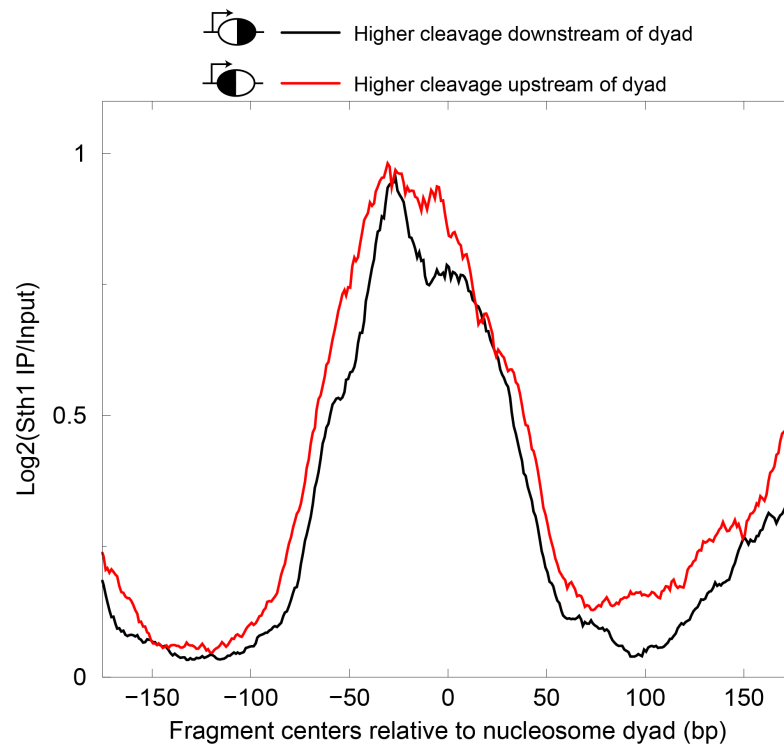



Figure S12

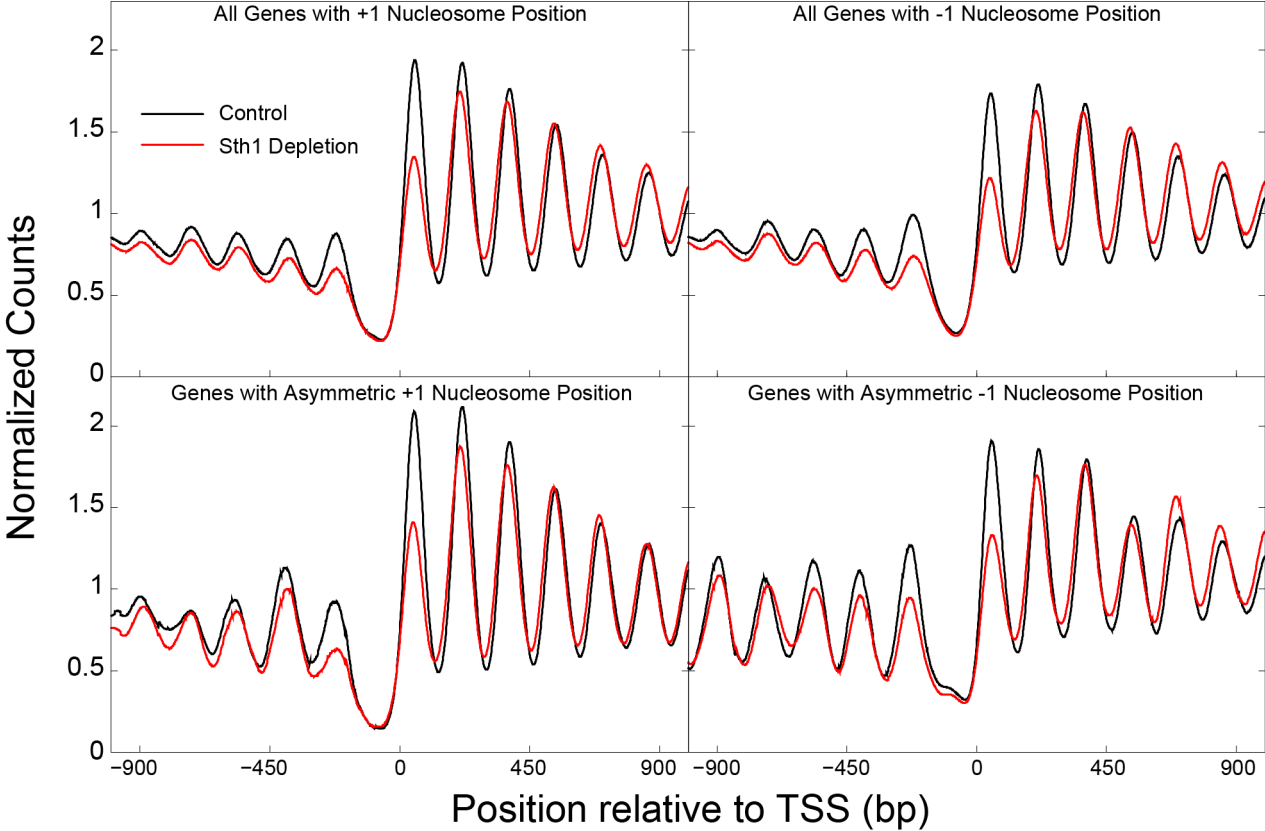

**Table S1. Genes with asymmetric +1 nucleosome**

|           |           |         |         |           |           |         |         |           |
|-----------|-----------|---------|---------|-----------|-----------|---------|---------|-----------|
| YIL156W   | YEL004W   | YOR003W | YDL105W | YJL036W   | YBL059C-A | YMR097C | YPR119W | YGR175C   |
| YIL143C   | YER010C   | YOR036W | YDL102W | YJL019W   | YBL031W   | YMR104C | YPR134W | YGR185C   |
| YIL129C   | YER039C   | YOR039W | YDL064W | YJL001W   | YBL023C   | YMR115W | YPR163C | YGR218W   |
| YIL119C   | YER041W   | YOR064C | YDL058W | YJR010C-A | YBR002C   | YMR123W | YPR186C | YGR227W   |
| YIL084C   | YER068W   | YOR100C | YDL017W | YJR042W   | YBR029C   | YMR127C | YPR188C | YGR232W   |
| YIL078W   | YER069W   | YOR106W | YDL013W | YJR053W   | YBR044C   | YMR128W | YPR193C | YGR245C   |
| YIL076W   | YER074W   | YOR113W | YDL004W | YJR067C   | YBR059C   | YMR129W | YAL067C | YGR271C-A |
| YIL074C   | YER114C   | YOR117W | YDR005C | YJR083C   | YBR076W   | YMR152W | YAL048C | YGR277C   |
| YIL072W   | YER118C   | YOR119C | YDR023W | YJR126C   | YBR088C   | YMR153W | YAL044C |           |
| YIL051C   | YER133W   | YOR144C | YDR044W | YJR140C   | YBR094W   | YMR154C | YAL043C |           |
| YIL019W   | YER151C   | YOR160W | YDR060W | YJR150C   | YBR102C   | YMR168C | YAL035W |           |
| YIR012W   | YER159C   | YOR193W | YDR062W | YJR156C   | YBR132C   | YMR177W | YAL034C |           |
| YIR034C   | YER168C   | YOR211C | YDR086C | YLL050C   | YBR139W   | YMR197C | YAL026C |           |
| YCL054W   | YNL307C   | YOR213C | YDR103W | YLL040C   | YBR147W   | YMR220W | YAL025C |           |
| YCL024W   | YNL306W   | YOR227W | YDR110W | YLL036C   | YBR155W   | YMR226C | YAL024C |           |
| YCR003W   | YNL284C   | YOR253W | YDR145W | YLL014W   | YBR160W   | YMR229C | YAL017W |           |
| YCR028C   | YNL265C   | YOR255W | YDR160W | YLL011W   | YBR169C   | YMR233W | YAL002W |           |
| YCR030C   | YNL262W   | YOR305W | YDR163W | YLL001W   | YBR170C   | YMR235C | YAR014C |           |
| YCR031C   | YNL223W   | YOR323C | YDR167W | YLR008C   | YBR188C   | YMR260C | YGL243W |           |
| YCR032W   | YNL202W   | YOR346W | YDR190C | YLR014C   | YBR205W   | YMR270C | YGL232W |           |
| YCR033W   | YNL197C   | YKL214C | YDR226W | YLR071C   | YBR212W   | YMR298W | YGL227W |           |
| YCR035C   | YNL147W   | YKL204W | YDR235W | YLR087C   | YBR216C   | YPL266W | YGL213C |           |
| YCR048W   | YNL136W   | YKL160W | YDR236C | YLR088W   | YBR247C   | YPL254W | YGL212W |           |
| YCR071C   | YNL135C   | YKL154W | YDR244W | YLR102C   | YBR248C   | YPL234C | YGL186C |           |
| YCR086W   | YNL119W   | YKL149C | YDR284C | YLR105C   | YBR250W   | YPL228W | YGL180W |           |
| YCR092C   | YNL101W   | YKL126W | YDR292C | YLR117C   | YBR268W   | YPL214C | YGL148W |           |
| YCR106W   | YNL088W   | YKL092C | YDR299W | YLR119W   | YBR280C   | YPL212C | YGL137W |           |
| YHL023C   | YNL087W   | YKL058W | YDR301W | YLR127C   | YBR282W   | YPL202C | YGL111W |           |
| YHL007C   | YNL075W   | YKL012W | YDR305C | YLR153C   | YFL055W   | YPL183C | YGL106W |           |
| YHR004C   | YNL054W   | YKL010C | YDR315C | YLR183C   | YFL037W   | YPL175W | YGL105W |           |
| YHR016C   | YNL021W   | YKL009W | YDR321W | YLR191W   | YFL036W   | YPL152W | YGL093W |           |
| YHR038W   | YNR007C   | YKR001C | YDR323C | YLR193C   | YFL009W   | YPL133C | YGL083W |           |
| YHR041C   | YNR020C   | YKR009C | YDR335W | YLR209C   | YFL008W   | YPL118W | YGL077C |           |
| YHR076W   | YNR031C   | YKR028W | YDR337W | YLR213C   | YFL002C   | YPL115C | YGL060W |           |
| YHR085W   | YNR032C-A | YKR029C | YDR362C | YLR229C   | YML118W   | YPL105C | YGL054C |           |
| YHR108W   | YNR035C   | YKR043C | YDR388W | YLR246W   | YML105C   | YPL070W | YGL027C |           |
| YHR111W   | YNR041C   | YKR057W | YDR390C | YLR250W   | YML104C   | YPL059W | YGL026C |           |
| YHR132C   | YNR053C   | YKR068C | YDR410C | YLR260W   | YML086C   | YPL031C | YGR043C |           |
| YHR132W-A | YOL146W   | YKR074W | YDR424C | YLR275W   | YML081C-A | YPL023C | YGR085C |           |
| YHR146W   | YOL139C   | YKR081C | YDR425W | YLR353W   | YML073C   | YPL009C | YGR090W |           |
| YHR155W   | YOL120C   | YKR082W | YDR447C | YLR363C   | YML068W   | YPR020W | YGR100W |           |
| YHR158C   | YOL112W   | YKR094C | YDR457W | YLR368W   | YML064C   | YPR062W | YGR101W |           |
| YHR160C   | YOL108C   | YKR096W | YDR468C | YLR376C   | YML060W   | YPR081C | YGR116W |           |
| YHR197W   | YOL105C   | YDL220C | YDR486C | YLR383W   | YML046W   | YPR083W | YGR128C |           |
| YEL059C-A | YOL080C   | YDL209C | YDR515W | YLR386W   | YML043C   | YPR085C | YGR132C |           |
| YEL043W   | YOL078W   | YDL153C | YJL184W | YLR443W   | YML041C   | YPR098C | YGR133W |           |
| YEL029C   | YOL077C   | YDL116W | YJL183W | YLR450W   | YML032C   | YPR102C | YGR141W |           |
| YEL024W   | YOL034W   | YDL112W | YJL093C | YBL105C   | YML029W   | YPR112C | YGR156W |           |
| YEL022W   | YOL018C   | YDL107W | YJL080C | YBL097W   | YMR026C   | YPR113W | YGR170W |           |
| YEL012W   |           | YDL106C | YJL072C | YBL076C   | YMR061W   | YPR115W |         |           |

**Table S2. Genes with asymmetric -1 nucleosome**

|         |           |           |
|---------|-----------|-----------|
| YIL140W | YKL082C   | YBR228W   |
| YIL033C | YKL068W   | YBR240C   |
| YIR021W | YKL024C   | YFR021W   |
| YCL035C | YKR003W   | YFR051C   |
| YCR034W | YKR009C   | YML118W   |
| YHR006W | YKR095W   | YML111W   |
| YHR052W | YDL245C   | YML070W   |
| YHR085W | YDL243C   | YML019W   |
| YHR094C | YDL176W   | YMR017W   |
| YHR142W | YDL168W   | YMR146C   |
| YEL069C | YDL035C   | YMR208W   |
| YEL062W | YDR019C   | YMR260C   |
| YER027C | YDR052C   | YMR318C   |
| YER052C | YDR110W   | YPL282C   |
| YER086W | YDR268W   | YPL281C   |
| YER090W | YDR294C   | YPL266W   |
| YER109C | YDR308C   | YPL246C   |
| YER183C | YDR414C   | YPL188W   |
| YNL327W | YDR446W   | YPL169C   |
| YNL322C | YDR499W   | YPR054W   |
| YNL312W | YJL190C   | YPR194C   |
| YNL297C | YJL186W   | YAL067C   |
| YNL254C | YJL154C   | YAL025C   |
| YNL222W | YJL129C   | YAR033W   |
| YNL189W | YJL093C   | YGL258W   |
| YNL185C | YJL083W   | YGL251C   |
| YNL166C | YJL014W   | YGL223C   |
| YNL142W | YJL005W   | YGL170C   |
| YNL076W | YJR055W   | YGL139W   |
| YNL032W | YJR110W   | YGL137W   |
| YNL026W | YJR158W   | YGL040C   |
| YNR020C | YLL064C   | YGR010W   |
| YNR039C | YLL063C   | YGR140W   |
| YNR059W | YLL018C   | YGR200C   |
| YNR072W | YLR013W   | YGR206W   |
| YOL136C | YLR025W   | YGR252W   |
| YOL124C | YLR027C   | YGR257C   |
| YOL022C | YLR047C   | YGR271C-A |
| YOR001W | YLR166C   |           |
| YOR014W | YLR167W   |           |
| YOR061W | YLR222C   |           |
| YOR130C | YLR337C   |           |
| YOR281C | YLR418C   |           |
| YOR354C | YBL101C   |           |
| YOR393W | YBL080C   |           |
| YOR394W | YBL061C   |           |
| YKL192C | YBL059C-A |           |
| YKL179C | YBL015W   |           |
| YKL134C | YBR070C   |           |
| YKL101W | YBR200W   |           |

**Table S3. GO term enrichment analysis of genes with asymmetric  $\pm 1$  nucleosome**

| GOID                                                                                                                                                                                                                                                 | GO_term            | Cluster frequency         | Background frequency                   | P-value | FDR   | Expected False Positives | Gene(s) annotated to the term                                                                                                                                                                                                                                                                                                                                                                                        |
|------------------------------------------------------------------------------------------------------------------------------------------------------------------------------------------------------------------------------------------------------|--------------------|---------------------------|----------------------------------------|---------|-------|--------------------------|----------------------------------------------------------------------------------------------------------------------------------------------------------------------------------------------------------------------------------------------------------------------------------------------------------------------------------------------------------------------------------------------------------------------|
| 42255                                                                                                                                                                                                                                                | ribosome assembly  | 19 out of 532 genes, 3.6% | 54 out of 4355 background genes, 1.2%  | 0.014   | 0.00% | 0.00                     | DRS2/YAL026C:FUN12/YAL035W:RPS14A/YCR031C:MAK21/YDR060W:RPS17B/YDR447C:SPB4/YFL002C:RPL11B/YGR085C:IP11/YHR085W:RIX1/YHR197W:SQT1/YIR012W:MRT4/YKL009W:RPF2/YKR081C:RPL40B/YKR094C:RPS31/YLR167W:RPL6A/YML073C:BRX1/YOL077C:REX4/YOL080C:RPL11A/YPR102C:MRD1/YPR112C                                                                                                                                                 |
| 70925                                                                                                                                                                                                                                                | organelle assembly | 30 out of 532 genes, 5.6% | 114 out of 4355 background genes, 2.6% | 0.036   | 0.00% | 0.00                     | DRS2/YAL026C:FUN12/YAL035W:PKC1/YBL105C:KCC4/YCL024W:RPS14A/YCR031C:MAK21/YDR060W:RPS17B/YDR447C:NPR2/YEL062W:SPB4/YFL002C:ATG1/YGL180W:RPL11B/YGR085C:CBF2/YGR140W:STE20/YHL007C:NPR3/YHL023C:IP11/YHR085W:RIX1/YHR197W:SQT1/YIR012W:MRT4/YKL009W:RPF2/YKR081C:RPL40B/YKR094C:RPS31/YLR167W:RPL6A/YML073C:CEP3/YMR168C:BNI5/YNL166C:ATG4/YNL223W:ATG3/YNR007C:BRX1/YOL077C:REX4/YOL080C:RPL11A/YPR102C:MRD1/YPR112C |
| GO Term enrichment carried out at <a href="http://www.yeastgenome.org">www.yeastgenome.org</a> ; Gene set: Genes with asymmetric $\pm 1$ nucleosome positions (n=532); Background gene set: Genes with defined $\pm 1$ nucleosome positions (n=4355) |                    |                           |                                        |         |       |                          |                                                                                                                                                                                                                                                                                                                                                                                                                      |

**Table S4: P-values for enrichment of remodelers over input at asymmetric nucleosomes**

| Factor | Nucleosome Position | T statistic | Paired T-test p-value (Null hypothesis: IP is less enriched relative to Input) | N   |
|--------|---------------------|-------------|--------------------------------------------------------------------------------|-----|
| Chd1   | Asymmetric +1       | -7.1        | 1.000                                                                          | 407 |
| Chd1   | Asymmetric -1       | 0.4         | 0.358                                                                          | 137 |
| Ino80  | Asymmetric +1       | -16.1       | 1.000                                                                          | 407 |
| Ino80  | Asymmetric -1       | -2.5        | 0.992                                                                          | 137 |
| Isw1   | Asymmetric +1       | -10.4       | 1.000                                                                          | 407 |
| Isw1   | Asymmetric -1       | -5.3        | 1.000                                                                          | 137 |
| Isw2   | Asymmetric +1       | -4.8        | 1.000                                                                          | 407 |
| Isw2   | Asymmetric -1       | 3.2         | 7E-04                                                                          | 137 |
| Mot1   | Asymmetric +1       | -6.1        | 1.000                                                                          | 407 |
| Mot1   | Asymmetric -1       | 1.6         | 0.053                                                                          | 137 |
| Swr1   | Asymmetric +1       | -0.1        | 0.542                                                                          | 399 |
| Swr1   | Asymmetric -1       | 0.7         | 0.230                                                                          | 134 |
| RSC    | Asymmetric +1       | 16.2        | 2E-46                                                                          | 407 |
| RSC    | Asymmetric -1       | 6.3         | 2E-09                                                                          | 137 |
| Spt15  | Asymmetric +1       | 1.4         | 0.077                                                                          | 407 |
| Spt15  | Asymmetric -1       | 3.0         | 0.002                                                                          | 138 |

**Table S5: Strains used for native ChIP-seq**

| Factor Profiled | Strain Name | Genotype                                                                                                       | Background | Source           | Sample | Mapped Fragments |
|-----------------|-------------|----------------------------------------------------------------------------------------------------------------|------------|------------------|--------|------------------|
| Ino80           | YTT1728     | <i>MATa ade2-1 can1-100 his3-11, 15 leu2-3, 112 trp1-1 ura3-1 RAD5+ INO80-3FLAG-kanMX4</i>                     | W1588-4C   | Toshio Tsukiyama | Input  | 17200837         |
|                 |             |                                                                                                                |            |                  | ChIP   | 15244851         |
| Swr1            | GZY33       | <i>MATa ade2-1 can1-100 his3-11, 15 leu2-3, 112 trp1-1 ura3-1 RAD5+ SWR1-3FLAG-kanMX4</i>                      | W1588-4C   | G. E. Z.         | Input  | 7179429          |
|                 |             |                                                                                                                |            |                  | ChIP   | 18369248         |
| Sth1            | GZY9        | <i>MATa ade2-1 can1-100 his3-11, 15 leu2-3, 112 trp1-1 ura3-1 RAD5+ STH1-3FLAG-kanMX4</i>                      | W1588-4C   | G. E. Z.         | Input  | 33546327         |
|                 |             |                                                                                                                |            |                  | ChIP   | 16837779         |
| Htz1            | YTT3249     | <i>MAT<math>\alpha</math> ade2-1 can1-100 his3-11, 15 leu2-3, 112 trp1-1 ura3-1 RAD5+ HTZ1-2L-3FLAG::KanMX</i> | W1588-4C   | Toshio Tsukiyama | Input  | 44025854         |
|                 |             |                                                                                                                |            |                  | ChIP   | 12958113         |

**Table S6: MNase-seq datasets****Published datasets – MNase-seq**

| Sample Number | Mapped Fragments | GEO Accession |
|---------------|------------------|---------------|
| 1             | 28640945         | GSM1080588    |
| 2             | 75234013         | GSM968690     |
| 3             | 28864170         | GSM968695     |
| 4             | 31312095         | GSM968697     |
| 5             | 33069391         | GSM968700     |
| 6             | 19821710         | GSM1199785    |

**Datasets generated in this study – MNase-seq**

| Sample Number          | Mapped Fragments | Strain Name | Background       | Genotype                                                                                   | Source           |
|------------------------|------------------|-------------|------------------|--------------------------------------------------------------------------------------------|------------------|
| 7                      | 93646206         | YTT1448     | W1588-4C         | <i>MATa ade2-1 can1-100 his3-11, 15 leu2-3, 112 trp1-1 ura3-1 RAD5+ ISW1-3FLAG-kanMX4</i>  | Toshio Tsukiyama |
| 8                      | 17200837         | YTT1728     | W1588-4C         | <i>MATa ade2-1 can1-100 his3-11, 15 leu2-3, 112 trp1-1 ura3-1 RAD5+ INO80-3FLAG-kanMX4</i> | Toshio Tsukiyama |
| 9                      | 7179429          | GZY33       | W1588-4C         | <i>MATa ade2-1 can1-100 his3-11, 15 leu2-3, 112 trp1-1 ura3-1 RAD5+ SWR1-3FLAG-kanMX4</i>  | G.E.Z.           |
| 10                     | 21504106         | GZY34       | W1588-4C         | <i>MATa ade2-1 can1-100 his3-11, 15 leu2-3, 112 trp1-1 ura3-1 RAD5+ FUN30-3FLAG-kanMX4</i> | G.E.Z.           |
| 11                     | 28052211         | YTT2094     | W1588-4C         | <i>MATa ade2-1 can1-100 his3-11, 15 leu2-3, 112 trp1-1 ura3-1 RAD5+ IOC3-3FLAG-kanMX4</i>  | Toshio Tsukiyama |
| 12                     | 33546327         | GZY9        | W1588-4C         | <i>MATa ade2-1 can1-100 his3-11, 15 leu2-3, 112 trp1-1 ura3-1 RAD5+ STH1-3FLAG-kanMX4</i>  | G.E.Z.           |
| 13                     | 59637061         | YTT1448     | W1588-4C         | <i>MATa ade2-1 can1-100 his3-11, 15 leu2-3, 112 trp1-1 ura3-1 RAD5+ ISW1-3FLAG-kanMX4</i>  | Toshio Tsukiyama |
| 14                     | 96429934         | YTT1726     | W1588-4C         | <i>MATa ade2-1 can1-100 his3-11, 15 leu2-3, 112 trp1-1 ura3-1 RAD5+ CHD1-3FLAG-kanMX4</i>  | Toshio Tsukiyama |
| <b>Total Fragments</b> |                  |             | <b>574138435</b> |                                                                                            |                  |
